# Supplementary material for: Structure and function of axo-axonic inhibition
Source: eLife. 2021 Dec 1;10:e73783. doi: 10.7554/eLife.73783 (PMC8758143; doi:10.7554/eLife.73783)
Supplement: Supplementary file 1. — For links showing the input to a single axon initial segment (AIS), the number of synapses from chandelier cell (ChC) and non-ChC sources is also provided. Note that cell IDs are 64-bit integers and will not display correctly in some programs. [file elife-73783-supp1.csv]

Description	Pyramidal Cell ID	ChC Synapses	Non-ChC Synapses	Total Synapses	URL
All cell body positions categorized by Excitatory/Inhibitiory/Glia (E/I/G)					https://www.microns-explorer.org/chc/soma/all_by_type
All PyC AIS bound markers					https://www.microns-explorer.org/chc/soma/ais_bounds
Two chandelier cells with soma dendrites, and axon. Synapses and dendro-dendritic contacts are labeled					https://www.microns-explorer.org/chc/soma/chc_cells
All chandelier cell axons and output synapses					https://www.microns-explorer.org/chc/axon/all_chc
Example sites with filopodia-like structures on chandelier axon					https://www.microns-explorer.org/chc/axon/filopodia
Pyramidal cell AIS inputs with synapses classified as chandelier or non-chandelier	648518346349519354	6	0	6	https://www.microns-explorer.org/chc/ais/1
Pyramidal cell AIS inputs with synapses classified as chandelier or non-chandelier	648518346349522230	6	5	11	https://www.microns-explorer.org/chc/ais/2
Pyramidal cell AIS inputs with synapses classified as chandelier or non-chandelier	648518346349524063	8	4	12	https://www.microns-explorer.org/chc/ais/3
Pyramidal cell AIS inputs with synapses classified as chandelier or non-chandelier	648518346349524141	12	7	19	https://www.microns-explorer.org/chc/ais/4
Pyramidal cell AIS inputs with synapses classified as chandelier or non-chandelier	648518346349524971	8	8	16	https://www.microns-explorer.org/chc/ais/5
Pyramidal cell AIS inputs with synapses classified as chandelier or non-chandelier	648518346349531254	6	0	6	https://www.microns-explorer.org/chc/ais/6
Pyramidal cell AIS inputs with synapses classified as chandelier or non-chandelier	648518346349531414	1	8	9	https://www.microns-explorer.org/chc/ais/7
Pyramidal cell AIS inputs with synapses classified as chandelier or non-chandelier	648518346349531526	1	4	5	https://www.microns-explorer.org/chc/ais/8
Pyramidal cell AIS inputs with synapses classified as chandelier or non-chandelier	648518346349531530	0	1	1	https://www.microns-explorer.org/chc/ais/9
Pyramidal cell AIS inputs with synapses classified as chandelier or non-chandelier	648518346349532295	12	3	15	https://www.microns-explorer.org/chc/ais/10
Pyramidal cell AIS inputs with synapses classified as chandelier or non-chandelier	648518346349532739	3	1	4	https://www.microns-explorer.org/chc/ais/11
Pyramidal cell AIS inputs with synapses classified as chandelier or non-chandelier	648518346349532791	6	4	10	https://www.microns-explorer.org/chc/ais/12
Pyramidal cell AIS inputs with synapses classified as chandelier or non-chandelier	648518346349532796	0	7	7	https://www.microns-explorer.org/chc/ais/13
Pyramidal cell AIS inputs with synapses classified as chandelier or non-chandelier	648518346349533058	13	4	17	https://www.microns-explorer.org/chc/ais/14
Pyramidal cell AIS inputs with synapses classified as chandelier or non-chandelier	648518346349533227	10	2	12	https://www.microns-explorer.org/chc/ais/15
Pyramidal cell AIS inputs with synapses classified as chandelier or non-chandelier	648518346349533267	3	0	3	https://www.microns-explorer.org/chc/ais/16
Pyramidal cell AIS inputs with synapses classified as chandelier or non-chandelier	648518346349533350	10	1	11	https://www.microns-explorer.org/chc/ais/17
Pyramidal cell AIS inputs with synapses classified as chandelier or non-chandelier	648518346349533482	21	5	26	https://www.microns-explorer.org/chc/ais/18
Pyramidal cell AIS inputs with synapses classified as chandelier or non-chandelier	648518346349533719	18	1	19	https://www.microns-explorer.org/chc/ais/19
Pyramidal cell AIS inputs with synapses classified as chandelier or non-chandelier	648518346349533811	1	5	6	https://www.microns-explorer.org/chc/ais/20
Pyramidal cell AIS inputs with synapses classified as chandelier or non-chandelier	648518346349534048	3	6	9	https://www.microns-explorer.org/chc/ais/21
Pyramidal cell AIS inputs with synapses classified as chandelier or non-chandelier	648518346349534072	10	16	26	https://www.microns-explorer.org/chc/ais/22
Pyramidal cell AIS inputs with synapses classified as chandelier or non-chandelier	648518346349534289	13	7	20	https://www.microns-explorer.org/chc/ais/23
Pyramidal cell AIS inputs with synapses classified as chandelier or non-chandelier	648518346349534794	7	2	9	https://www.microns-explorer.org/chc/ais/24
Pyramidal cell AIS inputs with synapses classified as chandelier or non-chandelier	648518346349534855	12	2	14	https://www.microns-explorer.org/chc/ais/25
Pyramidal cell AIS inputs with synapses classified as chandelier or non-chandelier	648518346349535192	8	3	11	https://www.microns-explorer.org/chc/ais/26
Pyramidal cell AIS inputs with synapses classified as chandelier or non-chandelier	648518346349535823	1	16	17	https://www.microns-explorer.org/chc/ais/27
Pyramidal cell AIS inputs with synapses classified as chandelier or non-chandelier	648518346349535847	6	0	6	https://www.microns-explorer.org/chc/ais/28
Pyramidal cell AIS inputs with synapses classified as chandelier or non-chandelier	648518346349536312	8	8	16	https://www.microns-explorer.org/chc/ais/29
Pyramidal cell AIS inputs with synapses classified as chandelier or non-chandelier	648518346349536679	11	6	17	https://www.microns-explorer.org/chc/ais/30
Pyramidal cell AIS inputs with synapses classified as chandelier or non-chandelier	648518346349536680	0	6	6	https://www.microns-explorer.org/chc/ais/31
Pyramidal cell AIS inputs with synapses classified as chandelier or non-chandelier	648518346349536809	6	3	9	https://www.microns-explorer.org/chc/ais/32
Pyramidal cell AIS inputs with synapses classified as chandelier or non-chandelier	648518346349536966	2	3	5	https://www.microns-explorer.org/chc/ais/33
Pyramidal cell AIS inputs with synapses classified as chandelier or non-chandelier	648518346349536988	14	6	20	https://www.microns-explorer.org/chc/ais/34
Pyramidal cell AIS inputs with synapses classified as chandelier or non-chandelier	648518346349537007	2	2	4	https://www.microns-explorer.org/chc/ais/35
Pyramidal cell AIS inputs with synapses classified as chandelier or non-chandelier	648518346349537042	2	6	8	https://www.microns-explorer.org/chc/ais/36
Pyramidal cell AIS inputs with synapses classified as chandelier or non-chandelier	648518346349537081	17	7	24	https://www.microns-explorer.org/chc/ais/37
Pyramidal cell AIS inputs with synapses classified as chandelier or non-chandelier	648518346349537145	2	3	5	https://www.microns-explorer.org/chc/ais/38
Pyramidal cell AIS inputs with synapses classified as chandelier or non-chandelier	648518346349537153	9	2	11	https://www.microns-explorer.org/chc/ais/39
Pyramidal cell AIS inputs with synapses classified as chandelier or non-chandelier	648518346349537160	5	8	13	https://www.microns-explorer.org/chc/ais/40
Pyramidal cell AIS inputs with synapses classified as chandelier or non-chandelier	648518346349537167	1	4	5	https://www.microns-explorer.org/chc/ais/41
Pyramidal cell AIS inputs with synapses classified as chandelier or non-chandelier	648518346349537270	2	7	9	https://www.microns-explorer.org/chc/ais/42
Pyramidal cell AIS inputs with synapses classified as chandelier or non-chandelier	648518346349537297	3	7	10	https://www.microns-explorer.org/chc/ais/43
Pyramidal cell AIS inputs with synapses classified as chandelier or non-chandelier	648518346349537385	25	7	32	https://www.microns-explorer.org/chc/ais/44
Pyramidal cell AIS inputs with synapses classified as chandelier or non-chandelier	648518346349537391	5	2	7	https://www.microns-explorer.org/chc/ais/45
Pyramidal cell AIS inputs with synapses classified as chandelier or non-chandelier	648518346349537426	9	9	18	https://www.microns-explorer.org/chc/ais/46
Pyramidal cell AIS inputs with synapses classified as chandelier or non-chandelier	648518346349537487	8	5	13	https://www.microns-explorer.org/chc/ais/47
Pyramidal cell AIS inputs with synapses classified as chandelier or non-chandelier	648518346349537509	10	2	12	https://www.microns-explorer.org/chc/ais/48
Pyramidal cell AIS inputs with synapses classified as chandelier or non-chandelier	648518346349537514	8	23	31	https://www.microns-explorer.org/chc/ais/49
Pyramidal cell AIS inputs with synapses classified as chandelier or non-chandelier	648518346349537516	2	5	7	https://www.microns-explorer.org/chc/ais/50
Pyramidal cell AIS inputs with synapses classified as chandelier or non-chandelier	648518346349537547	12	3	15	https://www.microns-explorer.org/chc/ais/51
Pyramidal cell AIS inputs with synapses classified as chandelier or non-chandelier	648518346349537641	5	9	14	https://www.microns-explorer.org/chc/ais/52
Pyramidal cell AIS inputs with synapses classified as chandelier or non-chandelier	648518346349537657	10	15	25	https://www.microns-explorer.org/chc/ais/53
Pyramidal cell AIS inputs with synapses classified as chandelier or non-chandelier	648518346349537687	0	2	2	https://www.microns-explorer.org/chc/ais/54
Pyramidal cell AIS inputs with synapses classified as chandelier or non-chandelier	648518346349537716	4	3	7	https://www.microns-explorer.org/chc/ais/55
Pyramidal cell AIS inputs with synapses classified as chandelier or non-chandelier	648518346349537717	9	0	9	https://www.microns-explorer.org/chc/ais/56
Pyramidal cell AIS inputs with synapses classified as chandelier or non-chandelier	648518346349537718	1	6	7	https://www.microns-explorer.org/chc/ais/57
Pyramidal cell AIS inputs with synapses classified as chandelier or non-chandelier	648518346349537818	5	3	8	https://www.microns-explorer.org/chc/ais/58
Pyramidal cell AIS inputs with synapses classified as chandelier or non-chandelier	648518346349537840	12	8	20	https://www.microns-explorer.org/chc/ais/59
Pyramidal cell AIS inputs with synapses classified as chandelier or non-chandelier	648518346349537848	3	1	4	https://www.microns-explorer.org/chc/ais/60
Pyramidal cell AIS inputs with synapses classified as chandelier or non-chandelier	648518346349537860	18	11	29	https://www.microns-explorer.org/chc/ais/61
Pyramidal cell AIS inputs with synapses classified as chandelier or non-chandelier	648518346349537883	16	8	24	https://www.microns-explorer.org/chc/ais/62
Pyramidal cell AIS inputs with synapses classified as chandelier or non-chandelier	648518346349537913	10	7	17	https://www.microns-explorer.org/chc/ais/63
Pyramidal cell AIS inputs with synapses classified as chandelier or non-chandelier	648518346349537978	3	7	10	https://www.microns-explorer.org/chc/ais/64
Pyramidal cell AIS inputs with synapses classified as chandelier or non-chandelier	648518346349538005	8	3	11	https://www.microns-explorer.org/chc/ais/65
Pyramidal cell AIS inputs with synapses classified as chandelier or non-chandelier	648518346349538015	8	5	13	https://www.microns-explorer.org/chc/ais/66
Pyramidal cell AIS inputs with synapses classified as chandelier or non-chandelier	648518346349538053	3	3	6	https://www.microns-explorer.org/chc/ais/67
Pyramidal cell AIS inputs with synapses classified as chandelier or non-chandelier	648518346349538056	6	7	13	https://www.microns-explorer.org/chc/ais/68
Pyramidal cell AIS inputs with synapses classified as chandelier or non-chandelier	648518346349538070	4	1	5	https://www.microns-explorer.org/chc/ais/69
Pyramidal cell AIS inputs with synapses classified as chandelier or non-chandelier	648518346349538098	11	2	13	https://www.microns-explorer.org/chc/ais/70
Pyramidal cell AIS inputs with synapses classified as chandelier or non-chandelier	648518346349538112	3	6	9	https://www.microns-explorer.org/chc/ais/71
Pyramidal cell AIS inputs with synapses classified as chandelier or non-chandelier	648518346349538157	12	7	19	https://www.microns-explorer.org/chc/ais/72
Pyramidal cell AIS inputs with synapses classified as chandelier or non-chandelier	648518346349538188	1	6	7	https://www.microns-explorer.org/chc/ais/73
Pyramidal cell AIS inputs with synapses classified as chandelier or non-chandelier	648518346349538192	7	9	16	https://www.microns-explorer.org/chc/ais/74
Pyramidal cell AIS inputs with synapses classified as chandelier or non-chandelier	648518346349538209	18	0	18	https://www.microns-explorer.org/chc/ais/75
Pyramidal cell AIS inputs with synapses classified as chandelier or non-chandelier	648518346349538235	4	0	4	https://www.microns-explorer.org/chc/ais/76
Pyramidal cell AIS inputs with synapses classified as chandelier or non-chandelier	648518346349538250	16	5	21	https://www.microns-explorer.org/chc/ais/77
Pyramidal cell AIS inputs with synapses classified as chandelier or non-chandelier	648518346349538278	8	1	9	https://www.microns-explorer.org/chc/ais/78
Pyramidal cell AIS inputs with synapses classified as chandelier or non-chandelier	648518346349538291	13	9	22	https://www.microns-explorer.org/chc/ais/79
Pyramidal cell AIS inputs with synapses classified as chandelier or non-chandelier	648518346349538336	18	9	27	https://www.microns-explorer.org/chc/ais/80
Pyramidal cell AIS inputs with synapses classified as chandelier or non-chandelier	648518346349538365	7	8	15	https://www.microns-explorer.org/chc/ais/81
Pyramidal cell AIS inputs with synapses classified as chandelier or non-chandelier	648518346349538368	10	4	14	https://www.microns-explorer.org/chc/ais/82
Pyramidal cell AIS inputs with synapses classified as chandelier or non-chandelier	648518346349538378	12	4	16	https://www.microns-explorer.org/chc/ais/83
Pyramidal cell AIS inputs with synapses classified as chandelier or non-chandelier	648518346349538387	13	4	17	https://www.microns-explorer.org/chc/ais/84
Pyramidal cell AIS inputs with synapses classified as chandelier or non-chandelier	648518346349538410	8	5	13	https://www.microns-explorer.org/chc/ais/85
Pyramidal cell AIS inputs with synapses classified as chandelier or non-chandelier	648518346349538421	11	7	18	https://www.microns-explorer.org/chc/ais/86
Pyramidal cell AIS inputs with synapses classified as chandelier or non-chandelier	648518346349538440	15	13	28	https://www.microns-explorer.org/chc/ais/87
Pyramidal cell AIS inputs with synapses classified as chandelier or non-chandelier	648518346349538466	2	3	5	https://www.microns-explorer.org/chc/ais/88
Pyramidal cell AIS inputs with synapses classified as chandelier or non-chandelier	648518346349538478	2	5	7	https://www.microns-explorer.org/chc/ais/89
Pyramidal cell AIS inputs with synapses classified as chandelier or non-chandelier	648518346349538527	6	3	9	https://www.microns-explorer.org/chc/ais/90
Pyramidal cell AIS inputs with synapses classified as chandelier or non-chandelier	648518346349538711	14	7	21	https://www.microns-explorer.org/chc/ais/91
Pyramidal cell AIS inputs with synapses classified as chandelier or non-chandelier	648518346349538715	6	4	10	https://www.microns-explorer.org/chc/ais/92
Pyramidal cell AIS inputs with synapses classified as chandelier or non-chandelier	648518346349538718	7	4	11	https://www.microns-explorer.org/chc/ais/93
Pyramidal cell AIS inputs with synapses classified as chandelier or non-chandelier	648518346349538787	14	12	26	https://www.microns-explorer.org/chc/ais/94
Pyramidal cell AIS inputs with synapses classified as chandelier or non-chandelier	648518346349539068	2	3	5	https://www.microns-explorer.org/chc/ais/95
Pyramidal cell AIS inputs with synapses classified as chandelier or non-chandelier	648518346349539070	1	10	11	https://www.microns-explorer.org/chc/ais/96
Pyramidal cell AIS inputs with synapses classified as chandelier or non-chandelier	648518346349539071	14	11	25	https://www.microns-explorer.org/chc/ais/97
Pyramidal cell AIS inputs with synapses classified as chandelier or non-chandelier	648518346349539095	1	10	11	https://www.microns-explorer.org/chc/ais/98
Pyramidal cell AIS inputs with synapses classified as chandelier or non-chandelier	648518346349539097	13	10	23	https://www.microns-explorer.org/chc/ais/99
Pyramidal cell AIS inputs with synapses classified as chandelier or non-chandelier	648518346349539100	6	6	12	https://www.microns-explorer.org/chc/ais/100
Pyramidal cell AIS inputs with synapses classified as chandelier or non-chandelier	648518346349539110	7	1	8	https://www.microns-explorer.org/chc/ais/101
Pyramidal cell AIS inputs with synapses classified as chandelier or non-chandelier	648518346349539333	14	5	19	https://www.microns-explorer.org/chc/ais/102
Pyramidal cell AIS inputs with synapses classified as chandelier or non-chandelier	648518346349539366	6	5	11	https://www.microns-explorer.org/chc/ais/103
Pyramidal cell AIS inputs with synapses classified as chandelier or non-chandelier	648518346349539414	3	0	3	https://www.microns-explorer.org/chc/ais/104
Pyramidal cell AIS inputs with synapses classified as chandelier or non-chandelier	648518346349539423	1	2	3	https://www.microns-explorer.org/chc/ais/105
Pyramidal cell AIS inputs with synapses classified as chandelier or non-chandelier	648518346349539435	5	4	9	https://www.microns-explorer.org/chc/ais/106
Pyramidal cell AIS inputs with synapses classified as chandelier or non-chandelier	648518346349539437	8	0	8	https://www.microns-explorer.org/chc/ais/107
Pyramidal cell AIS inputs with synapses classified as chandelier or non-chandelier	648518346349539448	9	4	13	https://www.microns-explorer.org/chc/ais/108
Pyramidal cell AIS inputs with synapses classified as chandelier or non-chandelier	648518346349539462	23	2	25	https://www.microns-explorer.org/chc/ais/109
Pyramidal cell AIS inputs with synapses classified as chandelier or non-chandelier	648518346349539464	3	8	11	https://www.microns-explorer.org/chc/ais/110
Pyramidal cell AIS inputs with synapses classified as chandelier or non-chandelier	648518346349539486	6	6	12	https://www.microns-explorer.org/chc/ais/111
Pyramidal cell AIS inputs with synapses classified as chandelier or non-chandelier	648518346349539517	4	5	9	https://www.microns-explorer.org/chc/ais/112
Pyramidal cell AIS inputs with synapses classified as chandelier or non-chandelier	648518346349539539	5	0	5	https://www.microns-explorer.org/chc/ais/113
Pyramidal cell AIS inputs with synapses classified as chandelier or non-chandelier	648518346349539560	12	4	16	https://www.microns-explorer.org/chc/ais/114
Pyramidal cell AIS inputs with synapses classified as chandelier or non-chandelier	648518346349539572	5	2	7	https://www.microns-explorer.org/chc/ais/115
Pyramidal cell AIS inputs with synapses classified as chandelier or non-chandelier	648518346349539575	12	1	13	https://www.microns-explorer.org/chc/ais/116
Pyramidal cell AIS inputs with synapses classified as chandelier or non-chandelier	648518346349539579	6	5	11	https://www.microns-explorer.org/chc/ais/117
Pyramidal cell AIS inputs with synapses classified as chandelier or non-chandelier	648518346349539593	6	2	8	https://www.microns-explorer.org/chc/ais/118
Pyramidal cell AIS inputs with synapses classified as chandelier or non-chandelier	648518346349539594	11	6	17	https://www.microns-explorer.org/chc/ais/119
Pyramidal cell AIS inputs with synapses classified as chandelier or non-chandelier	648518346349539599	4	4	8	https://www.microns-explorer.org/chc/ais/120
Pyramidal cell AIS inputs with synapses classified as chandelier or non-chandelier	648518346349539601	3	8	11	https://www.microns-explorer.org/chc/ais/121
Pyramidal cell AIS inputs with synapses classified as chandelier or non-chandelier	648518346349539653	24	7	31	https://www.microns-explorer.org/chc/ais/122
Pyramidal cell AIS inputs with synapses classified as chandelier or non-chandelier	648518346349539727	7	4	11	https://www.microns-explorer.org/chc/ais/123
Pyramidal cell AIS inputs with synapses classified as chandelier or non-chandelier	648518346349539768	4	3	7	https://www.microns-explorer.org/chc/ais/124
Pyramidal cell AIS inputs with synapses classified as chandelier or non-chandelier	648518346349539789	5	5	10	https://www.microns-explorer.org/chc/ais/125
Pyramidal cell AIS inputs with synapses classified as chandelier or non-chandelier	648518346349539803	11	3	14	https://www.microns-explorer.org/chc/ais/126
Pyramidal cell AIS inputs with synapses classified as chandelier or non-chandelier	648518346349539804	1	2	3	https://www.microns-explorer.org/chc/ais/127
Pyramidal cell AIS inputs with synapses classified as chandelier or non-chandelier	648518346349539806	1	10	11	https://www.microns-explorer.org/chc/ais/128
Pyramidal cell AIS inputs with synapses classified as chandelier or non-chandelier	648518346349539809	9	4	13	https://www.microns-explorer.org/chc/ais/129
Pyramidal cell AIS inputs with synapses classified as chandelier or non-chandelier	648518346349539819	12	10	22	https://www.microns-explorer.org/chc/ais/130
Pyramidal cell AIS inputs with synapses classified as chandelier or non-chandelier	648518346349539825	7	1	8	https://www.microns-explorer.org/chc/ais/131
Pyramidal cell AIS inputs with synapses classified as chandelier or non-chandelier	648518346349539840	14	10	24	https://www.microns-explorer.org/chc/ais/132
Pyramidal cell AIS inputs with synapses classified as chandelier or non-chandelier	648518346349539844	4	9	13	https://www.microns-explorer.org/chc/ais/133
Pyramidal cell AIS inputs with synapses classified as chandelier or non-chandelier	648518346349539845	4	3	7	https://www.microns-explorer.org/chc/ais/134
Pyramidal cell AIS inputs with synapses classified as chandelier or non-chandelier	648518346349539852	1	4	5	https://www.microns-explorer.org/chc/ais/135
Pyramidal cell AIS inputs with synapses classified as chandelier or non-chandelier	648518346349539853	12	15	27	https://www.microns-explorer.org/chc/ais/136
Pyramidal cell AIS inputs with synapses classified as chandelier or non-chandelier	648518346349539856	6	7	13	https://www.microns-explorer.org/chc/ais/137
Pyramidal cell AIS inputs with synapses classified as chandelier or non-chandelier	648518346349539864	4	3	7	https://www.microns-explorer.org/chc/ais/138
Pyramidal cell AIS inputs with synapses classified as chandelier or non-chandelier	648518346349539885	4	2	6	https://www.microns-explorer.org/chc/ais/139
Pyramidal cell AIS inputs with synapses classified as chandelier or non-chandelier	648518346349539886	0	2	2	https://www.microns-explorer.org/chc/ais/140
Pyramidal cell AIS inputs with synapses classified as chandelier or non-chandelier	648518346349539887	0	10	10	https://www.microns-explorer.org/chc/ais/141
Pyramidal cell AIS inputs with synapses classified as chandelier or non-chandelier	648518346349539890	10	1	11	https://www.microns-explorer.org/chc/ais/142
Pyramidal cell AIS inputs with synapses classified as chandelier or non-chandelier	648518346349539891	0	6	6	https://www.microns-explorer.org/chc/ais/143
Pyramidal cell AIS inputs with synapses classified as chandelier or non-chandelier	648518346349539892	9	6	15	https://www.microns-explorer.org/chc/ais/144
Pyramidal cell AIS inputs with synapses classified as chandelier or non-chandelier	648518346349539895	13	4	17	https://www.microns-explorer.org/chc/ais/145
Pyramidal cell AIS inputs with synapses classified as chandelier or non-chandelier	648518346349539896	3	4	7	https://www.microns-explorer.org/chc/ais/146
Pyramidal cell AIS inputs with synapses classified as chandelier or non-chandelier	648518346349539906	4	7	11	https://www.microns-explorer.org/chc/ais/147
Pyramidal cell AIS inputs with synapses classified as chandelier or non-chandelier	648518346349539961	0	8	8	https://www.microns-explorer.org/chc/ais/148
Pyramidal cell AIS inputs with synapses classified as chandelier or non-chandelier	648518346349540017	10	3	13	https://www.microns-explorer.org/chc/ais/149
Pyramidal cell AIS inputs with synapses classified as chandelier or non-chandelier	648518346349540048	4	5	9	https://www.microns-explorer.org/chc/ais/150
Pyramidal cell AIS inputs with synapses classified as chandelier or non-chandelier	648518346349540051	4	13	17	https://www.microns-explorer.org/chc/ais/151
Pyramidal cell AIS inputs with synapses classified as chandelier or non-chandelier	648518346349540055	5	10	15	https://www.microns-explorer.org/chc/ais/152
Pyramidal cell AIS inputs with synapses classified as chandelier or non-chandelier	648518346349540057	14	5	19	https://www.microns-explorer.org/chc/ais/153
