# Supplementary figures and images for: Structure and function of axo-axonic inhibition
Source: eLife journal article supplement (doi:10.7554/elife.73783), 2021-12-01

A

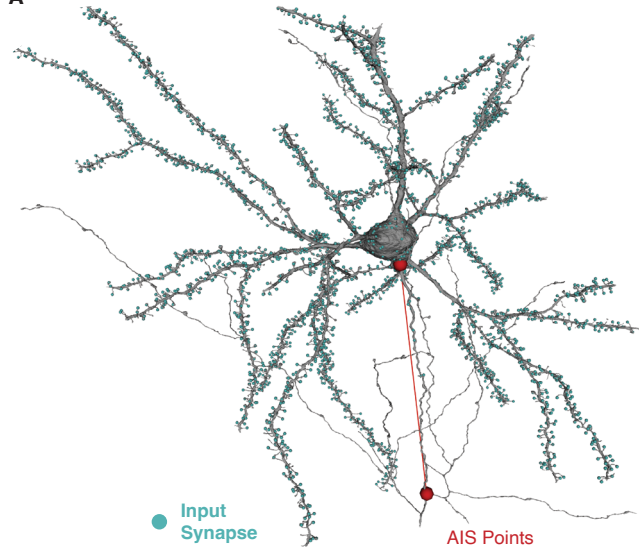

B

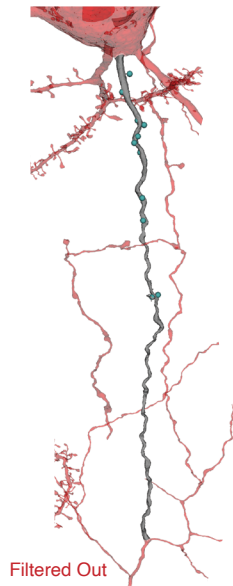

C

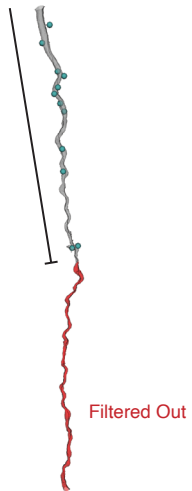

Supplement: supp [file elife-73783-supp-v1.zip]

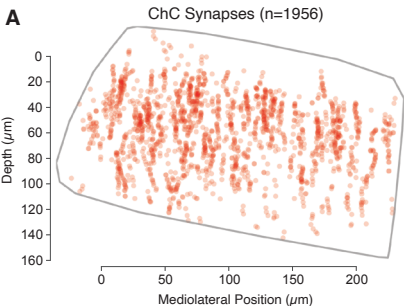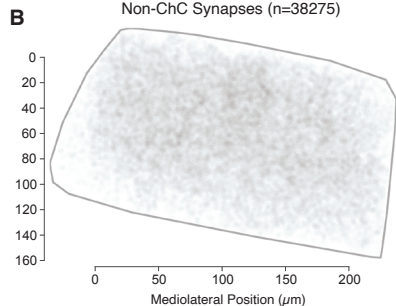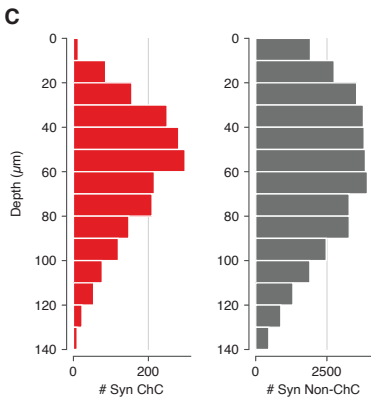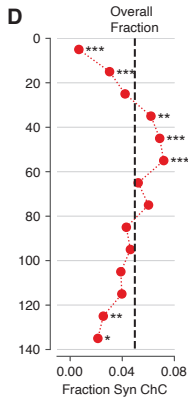

Supplement: supp [file elife-73783-supp-v1.zip]

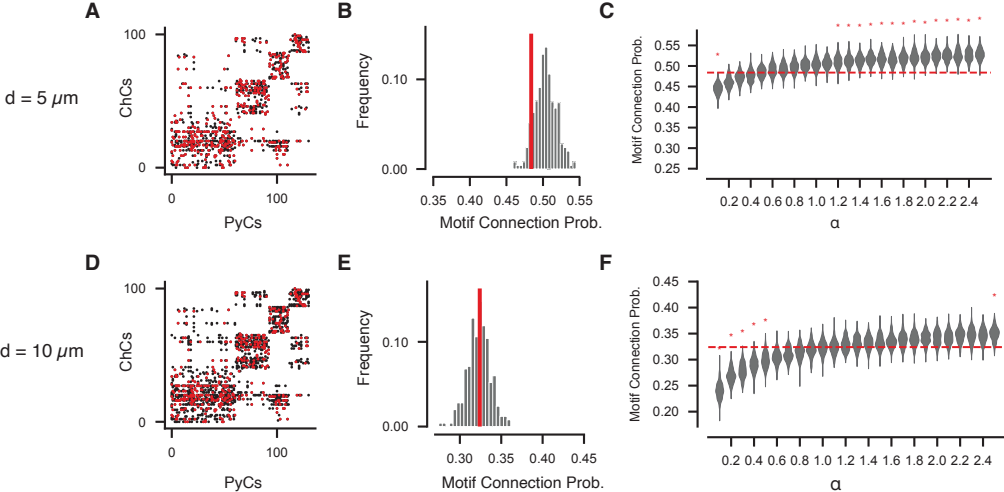

Supplement: supp [file elife-73783-supp-v1.zip]

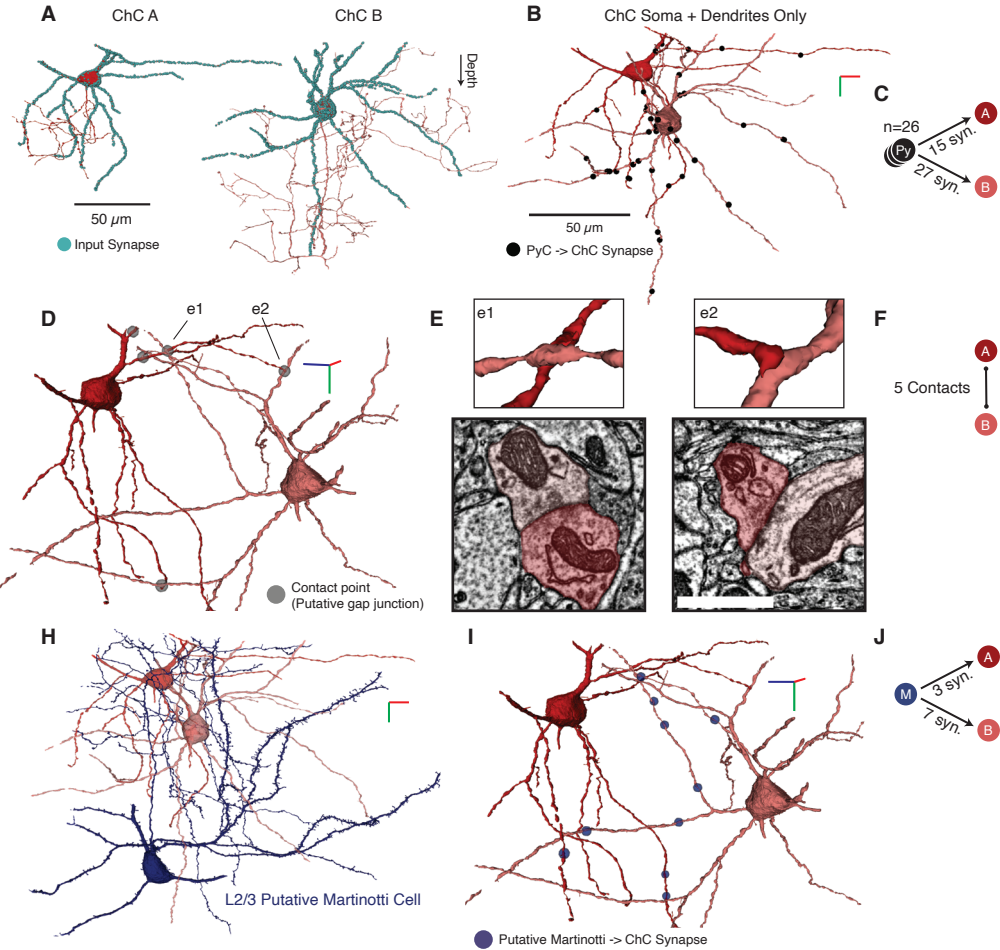

Supplement: supp [file elife-73783-supp-v1.zip]

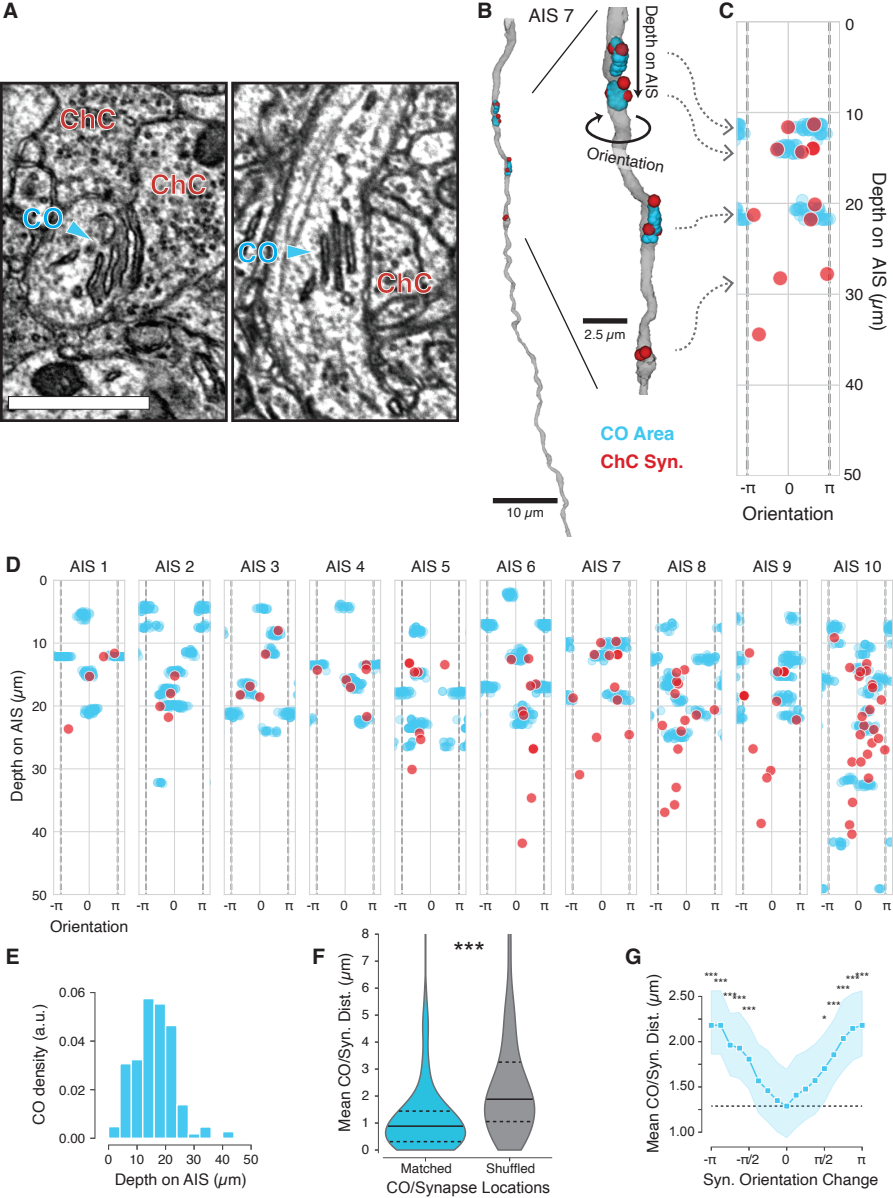

Supplement: supp [file elife-73783-supp-v1.zip]

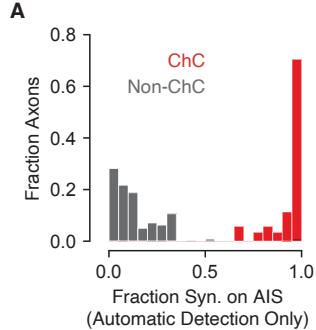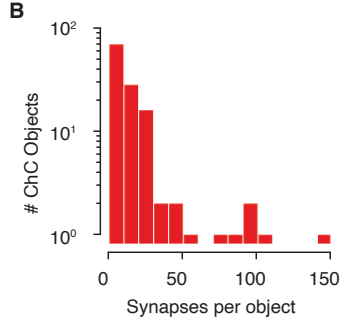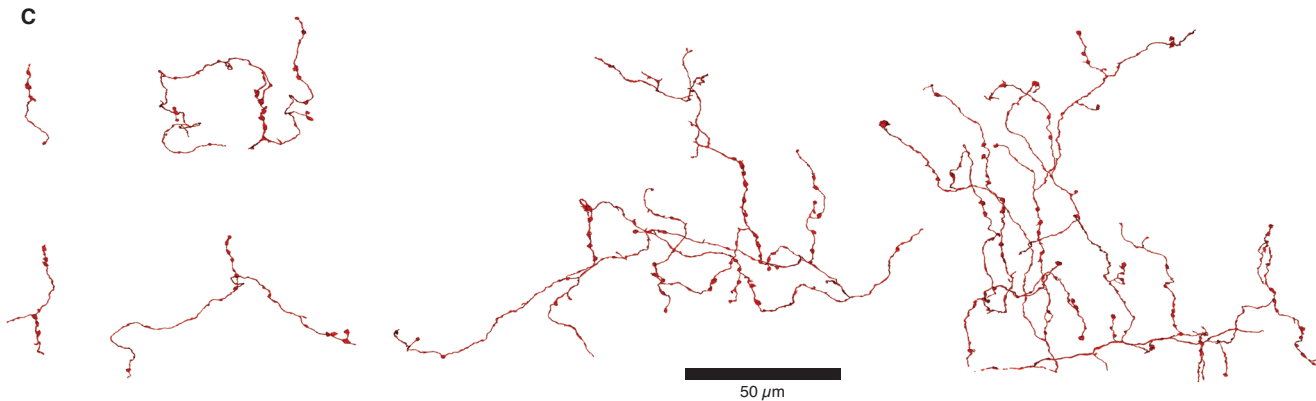

Supplement: supp [file elife-73783-supp-v1.zip]

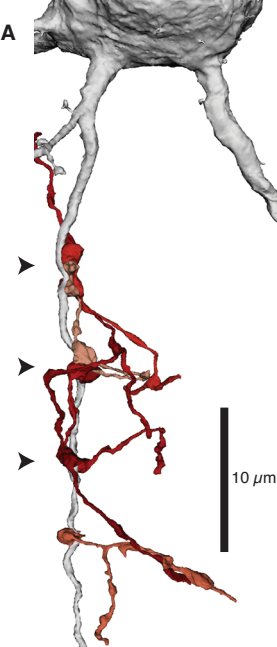

**B**

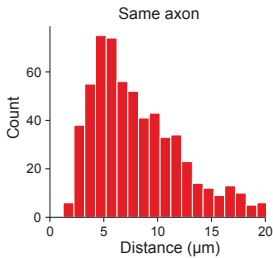

**C**

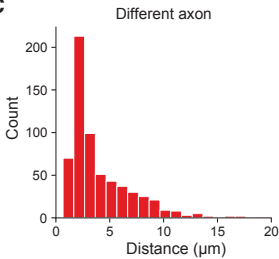

Supplement: supp [file elife-73783-supp-v1.zip]

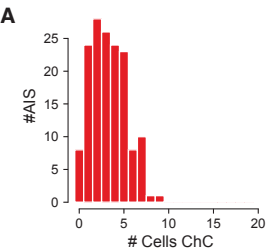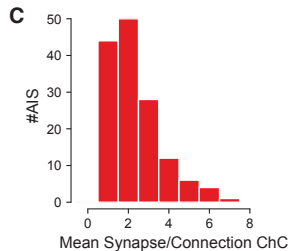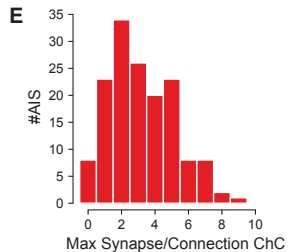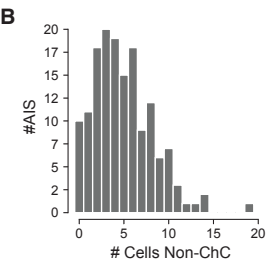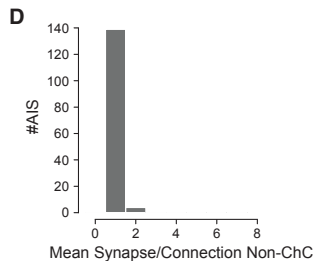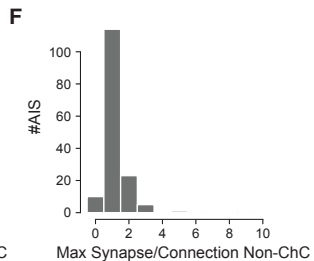

Supplement: supp [file elife-73783-supp-v1.zip]

$d = 5 \mu\text{m}$ 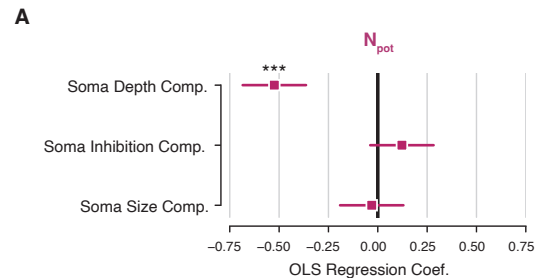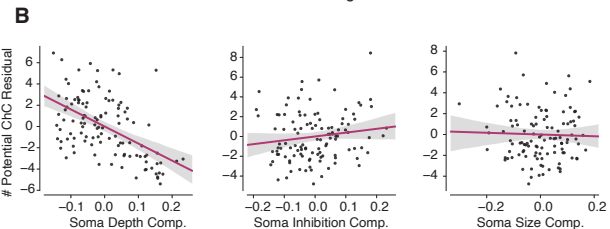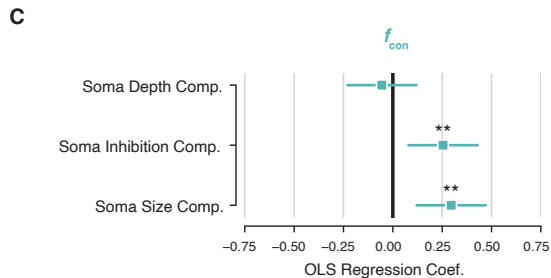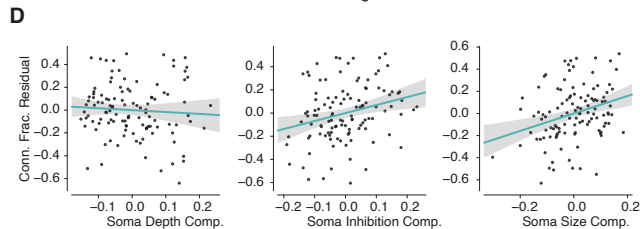 $d = 10 \mu\text{m}$ 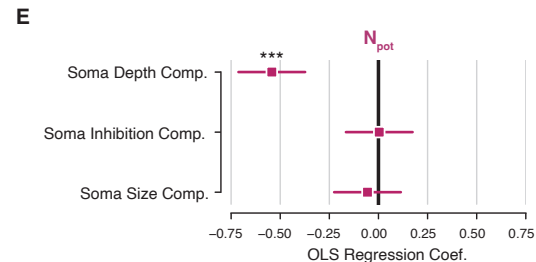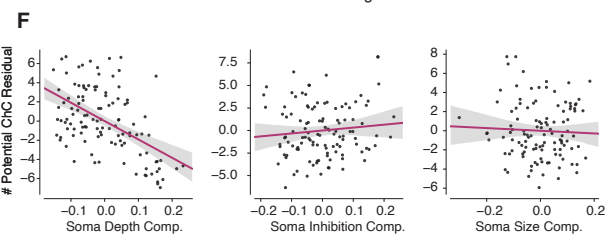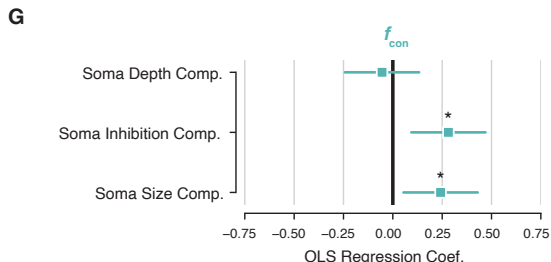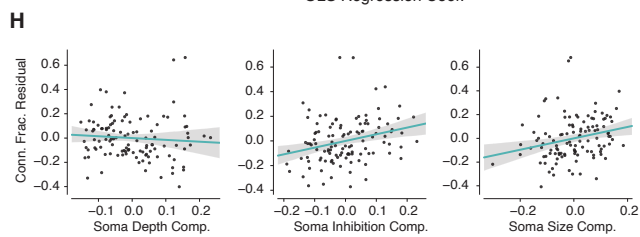

Supplement: supp [file elife-73783-supp-v1.zip]

**A** $R=0.00$ 

Soma Inhibition Comp.

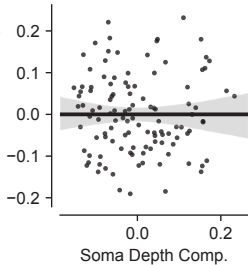**B** $R=0.00$ 

Soma Size Comp.

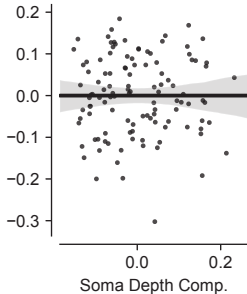**C** $R=0.00$ 

Soma Size Comp.

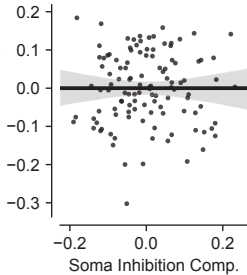

Supplement: supp [file elife-73783-supp-v1.zip]

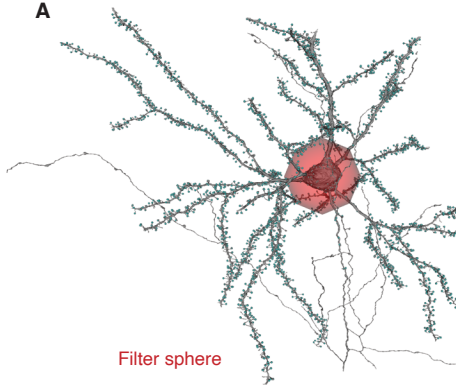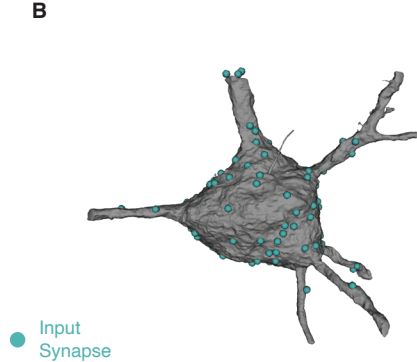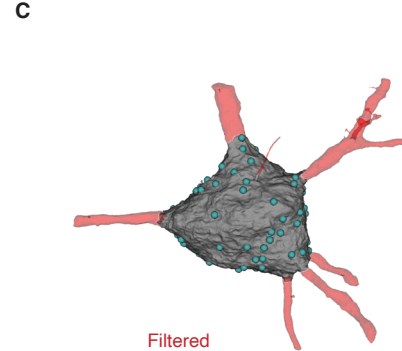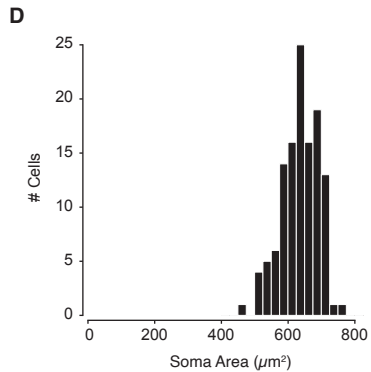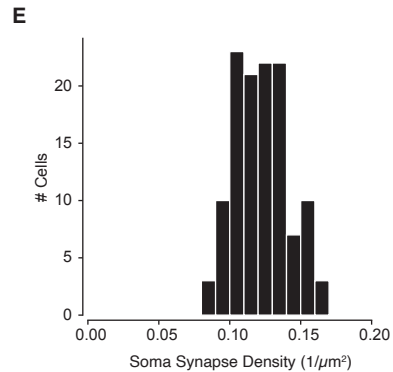

Supplement: supp [file elife-73783-supp-v1.zip]
